# Supplementary material
Source: PubMed Central journal article supplement (PMC8413132)
Supplement: mmc1.pdf [file mmc1.pdf]

# THE LANCET

## Healthy Longevity

### Supplementary appendix

This appendix formed part of the original submission and has been peer reviewed. We post it as supplied by the authors.

Supplement to: Tut G, Lancaster T, Krutikov M, et al. Profile of humoral and cellular immune responses to single doses of BNT162b2 or ChAdOx1 nCoV-19 vaccines in residents and staff within residential care homes (VIVALDI): an observational study. *Lancet Healthy Longev* 2021; published online August 19. [https://doi.org/10.1016/S2666-7568\(21\)00168-9](https://doi.org/10.1016/S2666-7568(21)00168-9).

**Supplementary Table 1: Geometric means and geometric mean SD factor presented for figure 1**

|                                              | Pre-vaccination        |                          | Post-vaccination       |                          |
|----------------------------------------------|------------------------|--------------------------|------------------------|--------------------------|
|                                              | Geometric mean (AU/mL) | Geometric mean SD factor | Geometric mean (AU/mL) | Geometric mean SD factor |
| <b>Without previous SARS-CoV-2 infection</b> |                        |                          |                        |                          |
| Staff                                        | 422.6                  | 9.881                    | 29853                  | 6.582                    |
| Residents                                    | 552.2                  | 6.768                    | 5043                   | 24.96                    |
| <b>With previous SARS-CoV-2 infection</b>    |                        |                          |                        |                          |
| Staff                                        | 12814                  | 4.001                    | 349062                 | 3.276                    |
| Residents                                    | 10278                  | 8.281                    | 208182                 | 12.18                    |
